# Supplementary material
Source: MDPI journal article supplement (https://www.mdpi.com/2073-4344/3/1/247)
Supplement: s1 [file s1]

## Supplementary Information

**Figure S1.** Estimation of surface area of a columnar, a granular, and a branched film. **(a)** Mimetic shapes of the columnar, granular and branched film. **(b)** Hexagonal packing arrangement of circles describing arrangement of plane bases of columns on the film and primary particles or plane bases of branches on the lateral surface of a column. **(c)** Hexagonal close packing of spheres for description of arrangement of primary particles in a column.

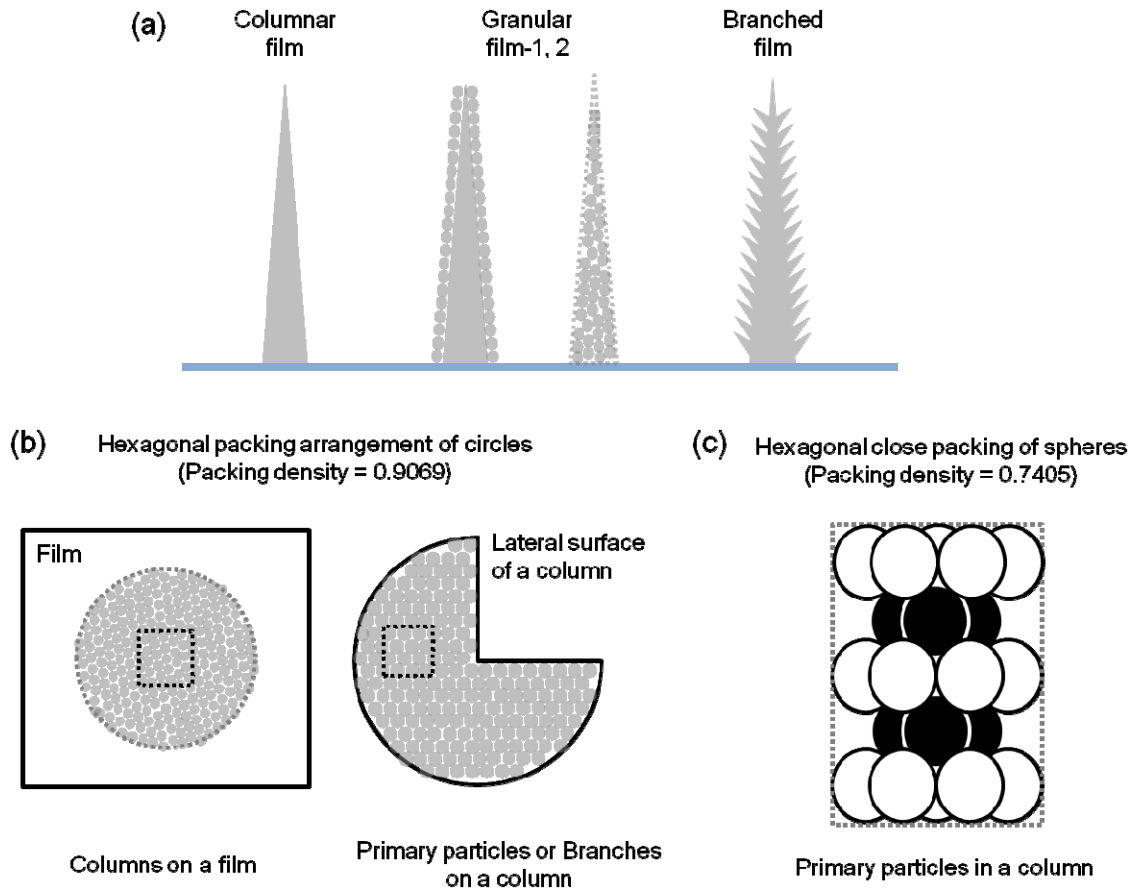

**Figure S2.** Light intensity of the arc Xe lamp operated by a 450 W power supply with and without a blue band pass filter. Blue shading indicates the area where photon energy of the light source ( $E_{ph}$ ) is higher than the bandgap energy of TiO<sub>2</sub> films ( $E_g$ ).

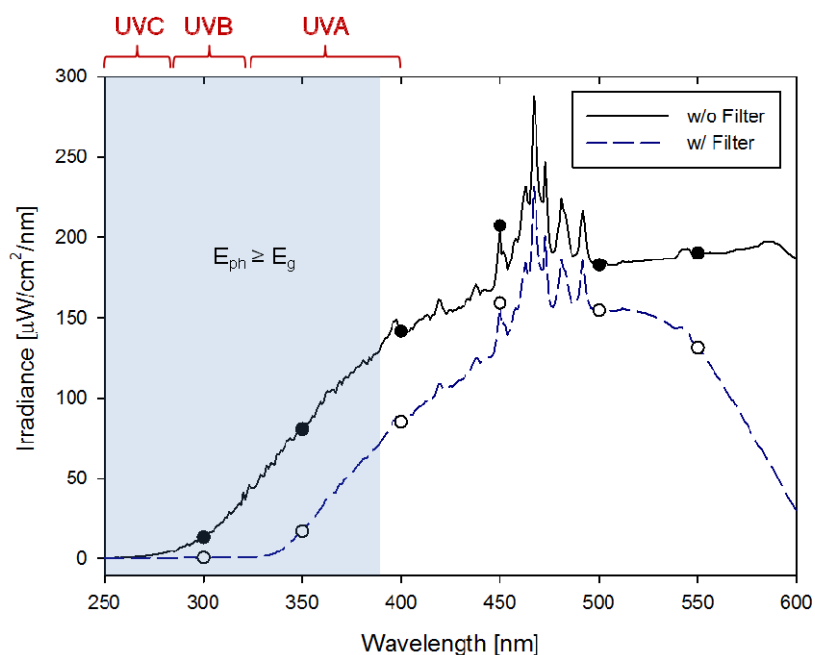

**Figure S3.** Effect of light only on *E. coli* viability with and without the blue pass filter.

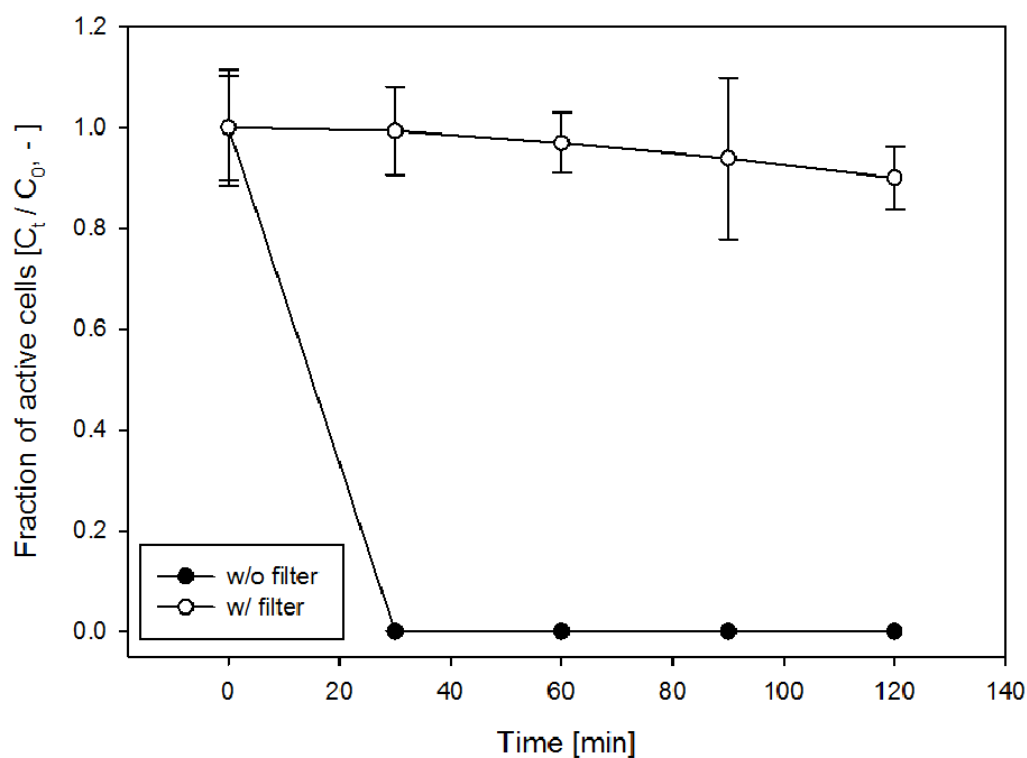

**Figure S4.** Effect of TiO<sub>2</sub> film on *E. coli* viability with and without external voltage in the dark.

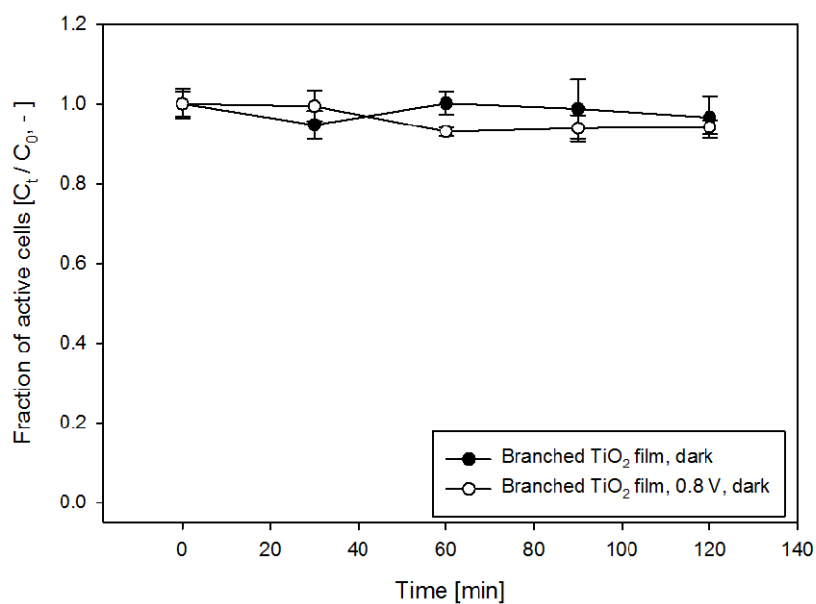

**Figure S5.** SEM images (top view) of columnar TiO<sub>2</sub> film (a) before and (b) after inactivation.

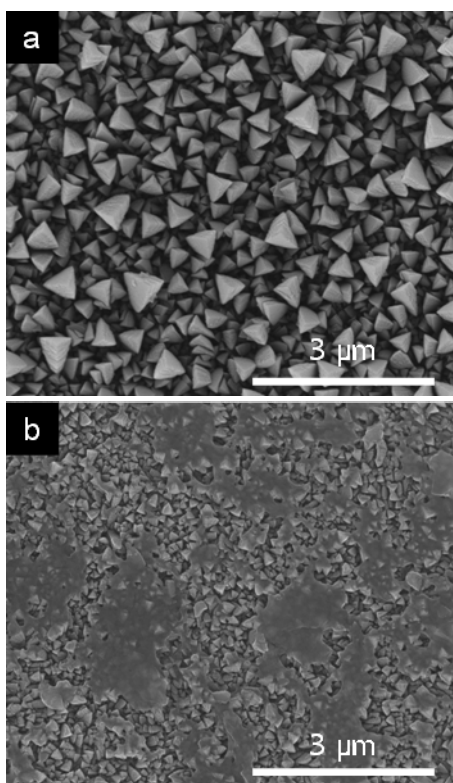

**Table S1.** Dimensions for estimation of surface area of films.

|                                                         |                   |
|---------------------------------------------------------|-------------------|
| Diameter of deposition area of a film                   | 11 mm             |
| Height of a column                                      | 20 $\mu\text{m}$  |
| Diameter of base circle of a column                     | 0.5 $\mu\text{m}$ |
| Diameter of primary particles of the granular structure | 15 nm             |
| Height of a branch                                      | 125 nm            |
| Diameter of base circle of a branch                     | 25 nm             |
| Hexagonal packing density of circles                    | 0.9069            |
| Hexagonal close packing density of spheres              | 0.7405            |

© 2013 by the authors; licensee MDPI, Basel, Switzerland. This article is an open access article distributed under the terms and conditions of the Creative Commons Attribution license (<http://creativecommons.org/licenses/by/3.0/>).
